# Supplementary material
Source: PubMed Central journal article supplement (PMC3386546)

# Figure 1

**A**

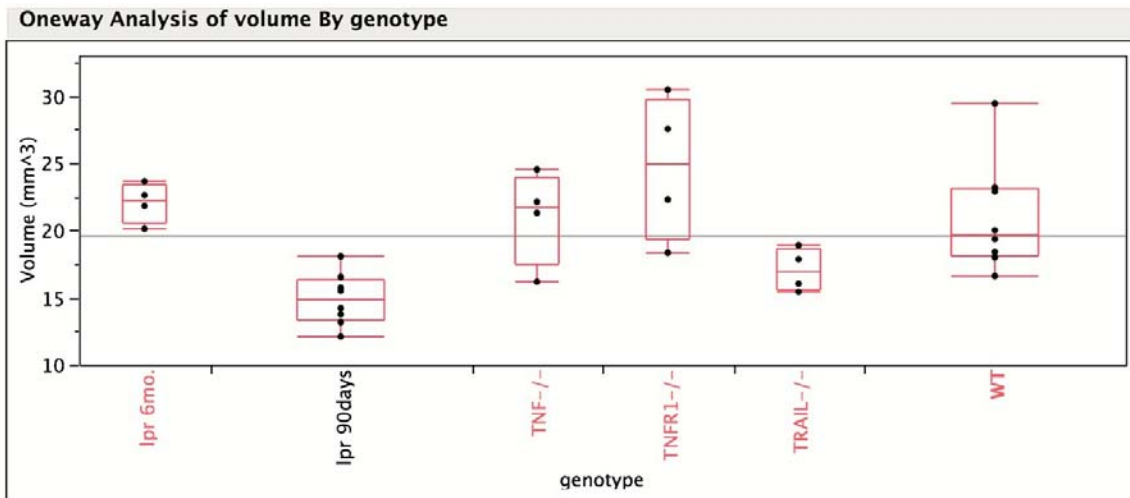

### Means Comparisons

#### Comparisons with a control using Dunnett's Method

Control Group = WT

| d       | Alpha |
|---------|-------|
| 2.71805 | 0.05  |

| Level      | Abs(Dif)-LSD | p-Value |
|------------|--------------|---------|
| TNFR1-/-   | -1.83        | 0.2965  |
| lpr 6mo.   | -4.43        | 0.9832  |
| TNF-/-     | -5.45        | 1.0000  |
| WT         | -4.49        | 1.0000  |
| TRAIL-/-   | -1.57        | 0.2382  |
| lpr 90days | 1.612        | 0.0048* |

Positive values show pairs of means that are significantly different.

**B**

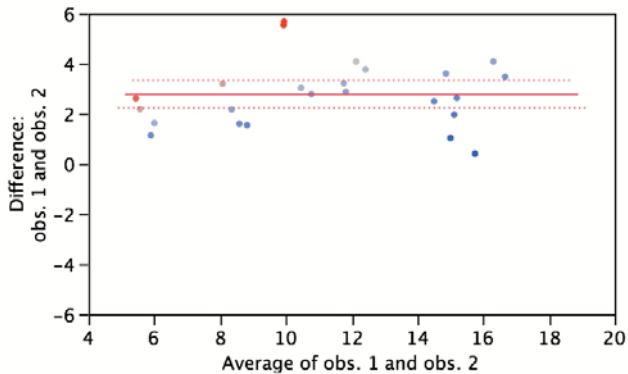

# Figure 2

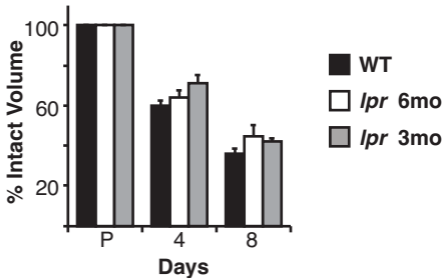

Figure 3

A

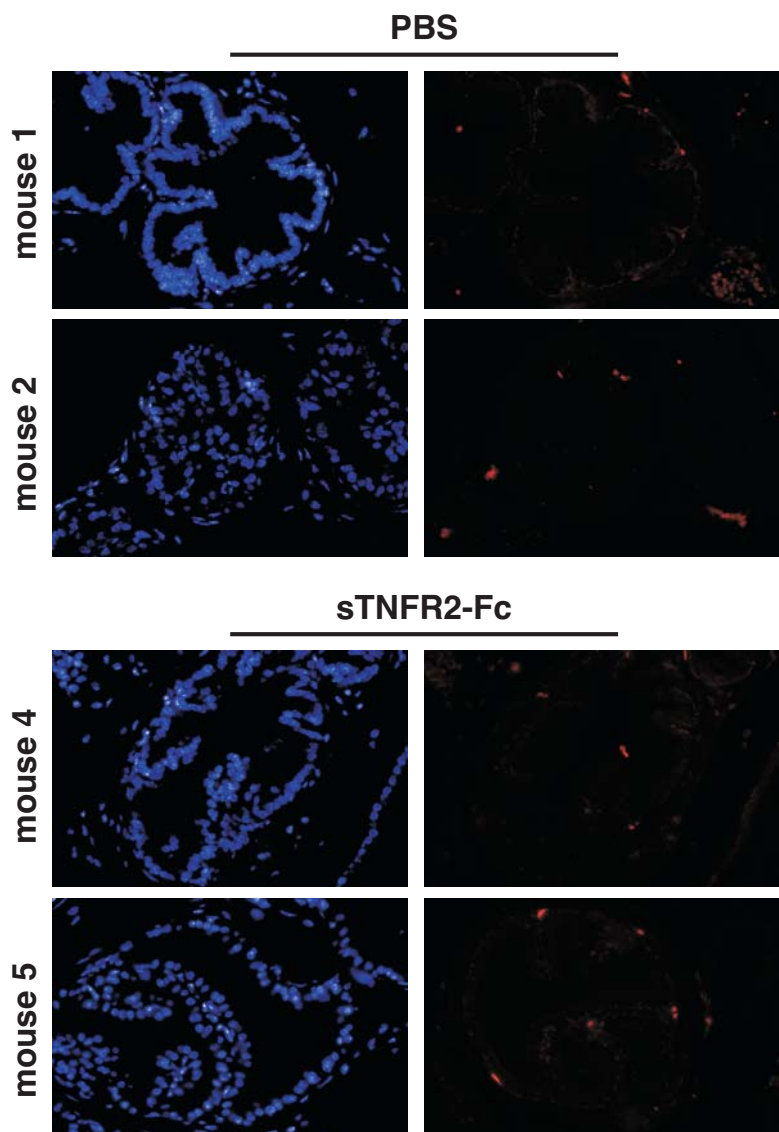

B

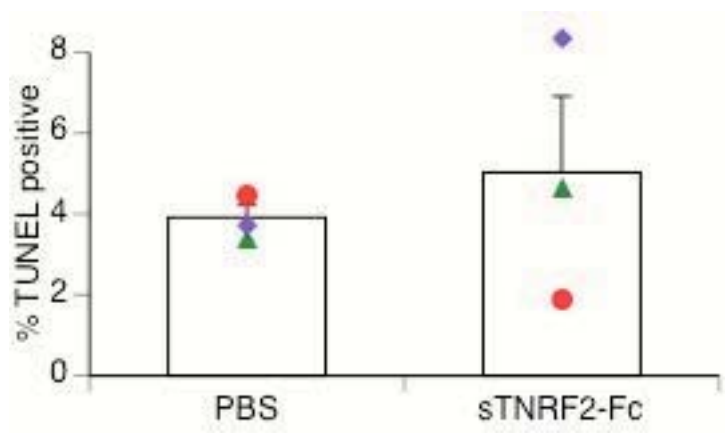

Figure 4

A

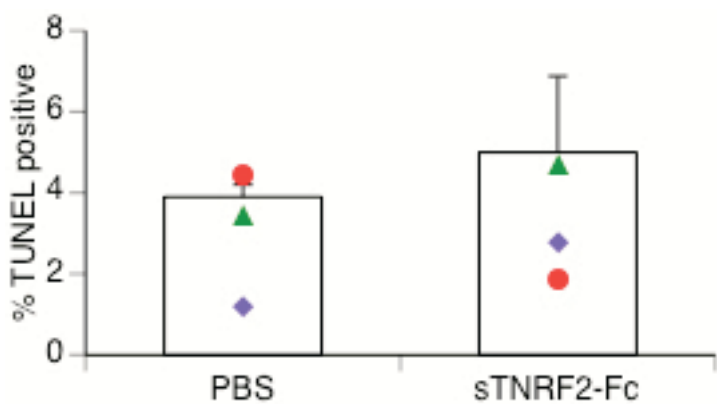

B

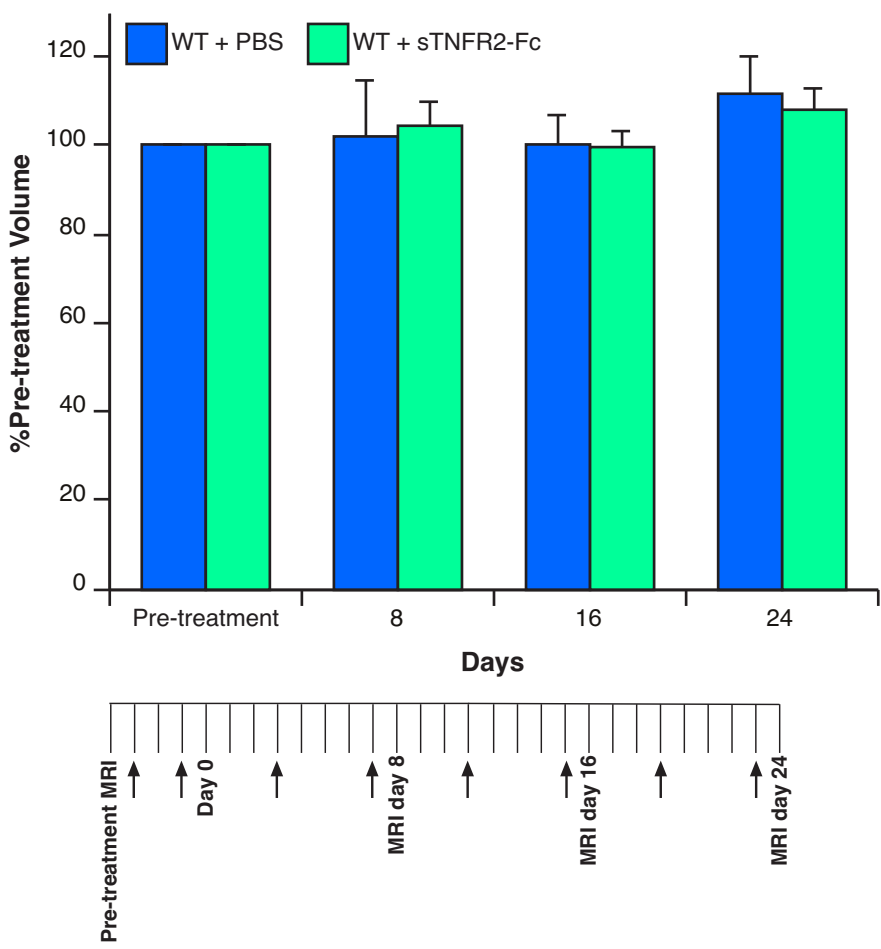

Supplement: supp_me.2010-0312_me-10-0312_Fig_1-5.pdf [file supp_me.2010-0312_me-10-0312_Fig_1-5.pdf]
